# Supplementary material
Source: PubMed Central journal article supplement (PMC3774117)
Supplement: NIHMS489658-supplement-01.pdf [file NIHMS489658-supplement-01.pdf]

**Supplemental Table S1. LC-MS/MS Assay Parameters.** Deuterium labeled 4-androstenedione (A4-D<sub>6</sub>), corticosterone (Cort-D<sub>8</sub>), estradiol (E2-D<sub>5</sub>), pregnenolone (P5-D<sub>4</sub>), and testosterone (T-D<sub>5</sub>) were used for internal standard as described in Method and Materials.

| Method       | Steroid Name                     | FW     | Molecular Ion (ES <sup>+</sup> ) | Transition Ion Quantified (ES <sup>+</sup> ) | Retention Time (min) | Internal Standard   | LLQ (ng/mL) | ULQ (ng/mL) |
|--------------|----------------------------------|--------|----------------------------------|----------------------------------------------|----------------------|---------------------|-------------|-------------|
| 1            | Androstenediol                   | 290.44 | 273.05                           | 255.15                                       | 9.6                  | T-D <sub>5</sub>    | 0.2         | 200         |
|              | Androstenedione                  | 286.40 | 287.10                           | 96.90                                        | 11.2                 | T-D <sub>5</sub>    | 0.05        | 50          |
|              | Corticosterone                   | 346.46 | 347.05                           | 329.20                                       | 7.9                  | Cort-D <sub>8</sub> | 0.2         | 200         |
|              | Cortisol                         | 362.46 | 363.10                           | 327.20                                       | 5.9                  | Cort-D <sub>8</sub> | 10          | 10,000      |
|              | DHEA                             | 288.43 | 289.10                           | 271.10                                       | 11.1                 | T-D <sub>5</sub>    | 1           | 1,000       |
|              | 11-Deoxycorticosterone           | 330.46 | 331.05                           | 108.95                                       | 10.6                 | T-D <sub>5</sub>    | 0.05        | 50          |
|              | 11-Deoxycortisol                 | 346.46 | 347.10                           | 109.00                                       | 8.2                  | Cort-D <sub>8</sub> | 0.05        | 50          |
|              | 17 $\alpha$ -Hydroxyprogesterone | 330.22 | 331.10                           | 109.00                                       | 11.3                 | T-D <sub>5</sub>    | 0.05        | 50          |
|              | 20 $\alpha$ -Hydroxyprogesterone | 316.47 | 317.05                           | 108.95                                       | 12.7                 | P5-D <sub>4</sub>   | 0.05        | 50          |
| Testosterone | 288.43                           | 289.00 | 96.90                            | 10.1                                         | T-D <sub>5</sub>     | 0.05                | 50          |             |
|              |                                  |        |                                  |                                              |                      |                     |             |             |
| 2            | Dihydrotestosterone              | 290.44 | 306.20                           | 255.10                                       | 14.4                 | A4-D <sub>6</sub>   | 0.10        | 500         |
|              | 11OHA                            | 302.42 | 333.00                           | 315.20                                       | 9.5                  | A4-D <sub>6</sub>   | 1           | 2000        |
|              | 7 $\alpha$ -Hydroxy-DHEA         | 304.43 | 320.20                           | 270.10                                       | 6.5                  | A4-D <sub>6</sub>   | 0.02        | 100         |
|              | 16 $\alpha$ -Hydroxy-DHEA        | 304.43 | 320.20                           | 284.10                                       | 8.8                  | A4-D <sub>6</sub>   | 0.10        | 500         |
|              | 17 $\alpha$ -Hydroxypregnenolone | 332.48 | 348.30                           | 330.00                                       | 12.5                 | A4-D <sub>6</sub>   | 0.1         | 500         |
|              | Pregnenolone                     | 316.48 | 332.35                           | 300.30                                       | 18.2                 | A4-D <sub>6</sub>   | 0.02        | 100         |
|              | Progesterone                     | 314.47 | 345.30                           | 124.00                                       | 17.5                 | A4-D <sub>6</sub>   | 0.02        | 100         |
|              |                                  |        |                                  |                                              |                      |                     |             |             |
| 3            | Estradiol                        | 272.39 | 506.00                           | 170.95                                       | 5.8                  | E2-D <sub>5</sub>   | 0.002       | 0.2         |
|              | Estrone                          | 270.37 | 504.00                           | 170.95                                       | 6.7                  | E2-D <sub>5</sub>   | 0.005       | 0.2         |

**Supplemental Table S2. LC-MS/MS Assay Performance Statistics**

| Steroid Name                     | Average % Deviation of QC Standards |        |         | Standard Curve Correlation |
|----------------------------------|-------------------------------------|--------|---------|----------------------------|
|                                  | Low QC                              | Mid QC | High QC | r <sup>2</sup>             |
| Androstenediol                   | 22.3                                | 4.0    | -2.9    | 0.9985                     |
| Androstenedione                  | 13.9                                | 11.5   | 12.4    | 0.9970                     |
| Corticosterone                   | 0.3                                 | -3.3   | -1.0    | 0.9986                     |
| Cortisol                         | -3.2                                | 12.8   | 19.0    | 0.9987                     |
| DHEA                             | 4.4                                 | 3.8    | 2.8     | 0.9984                     |
| 11-Deoxycorticosterone           | 3.4                                 | -2.0   | -4.2    | 0.9996                     |
| 11-Deoxycortisol                 | -1.0                                | -2.7   | 4.3     | 0.9987                     |
| 17 $\alpha$ -Hydroxyprogesterone | 1.1                                 | 9.3    | 14.8    | 0.9988                     |
| 20 $\alpha$ -Hydroxyprogesterone | 19.6                                | 23.3   | 26.2    | 0.9997                     |
| Testosterone                     | 10.3                                | 6.4    | 4.5     | 0.9985                     |
| Aldosterone                      | 19.1                                | 0.9    | 7.2     | 0.9993                     |
| Dihydrotestosterone              | 6.7                                 | -3.4   | -4.2    | 0.9907                     |
| 11OHA                            | 9.2                                 | 24.2   | 18.4    | 0.9993                     |
| 7 $\alpha$ -Hydroxy-DHEA         | 26.0                                | 23.1   | 18.1    | 0.9967                     |
| 16 $\alpha$ -Hydroxy-DHEA        | 9.3                                 | -2.4   | -8.0    | 0.9989                     |
| 17 $\alpha$ -Hydroxypregnenolone | -19.4                               | -22.0  | -22.3   | 0.9990                     |
| Pregnenolone                     | -8.8                                | -7.7   | -6.0    | 0.9994                     |
| Progesterone                     | -29.0                               | -31.3  | -29.1   | 0.9983                     |
| Estradiol                        | -33.2                               | -16.1  | -3.6    | 0.9980                     |
| Estrone                          | -33.2                               | -25.3  | 6.9     | 0.9970                     |
